# Supplementary material for: Unveiling the digital phenotype: A protocol for a prospective study on physical activity behavior in community-dwelling older adults
Source: Research Square preprint supplement (doi:10.21203/rs.3.rs-3896647/v1), 2024-01-30
Supplement: Supplementary file 1 [file 5e20808bf131d338c3385ed9.docx]

**Supplementary File 1 SPIRIT figure**

|  | **STUDY PERIOD** | | | | |
| --- | --- | --- | --- | --- | --- |
|  | ENROLMENT | ALLOCATION | POST ALLOCATION | | CLOSE OUT |
| **TIMEPOINT** | **-t1** | **0** | **t1**  Day 1 | **t2**  Day 14 | **tx** |
| **ENROLMENT** | | | | | |
| Eligibility screen | X | Not applicable |  |  |  |
| Informed consent | X |  |  |  |
| Allocation | Not applicable |  |  |  |
| **ASSESSMENTS** |  |  |  |  |  |
| *Self reporting assessment* |  |  | X |  |  |
| *Clinical assessment* |  |  | X |  |  |
| *Ecological Momentary Assessment* |  |  |  |  | X |
| *Time Series Assessment* |  |  |  |  | X |
